# Supplementary material for: Ciprofloxacin peptide-based nanoparticles confer antimicrobial efficacy against multidrug-resistant bacteria
Source: Royal Society of Chemistry journal article supplement (doi:10.1039/d3nj04003h), 2023-01-01
Supplement: d3nj04003h1.pdf [file d3nj04003h1.pdf]

## Supporting Information

### Ciprofloxacinated peptided-based nanoparticles confer antimicrobial efficacy against multidrug-resistant bacteria

Jian-Bin Zhen <sup>a,1,\*</sup>, Jia-Jia Yi <sup>b,1</sup>, Bing-Xiao Liu <sup>a</sup>, Yan-Jun Liu <sup>a</sup>, Xin-Yi Bu <sup>a</sup>, Xiao-Jing Wu <sup>a</sup>, Da Tang <sup>c,\*</sup>

<sup>a</sup> Department of Materials Engineering, Taiyuan Institute of Technology, Taiyuan 030008, China;

<sup>b</sup> College of Chemical Engineering and Technology, Taiyuan University of Technology, Taiyuan 030600, China;

<sup>c</sup> Chongqing Academy of animal science, Chongqing, 408599, China;

<sup>1</sup> These authors are contributed equally.

**E-mail addresses:** zhenjb187@163.com (Jian Bin Zhen)

**Corresponding authors:** Associate Professor, Jian Bin Zhen and Da Tang

#### Characterization

##### Proton Nuclear Magnetic Resonance (<sup>1</sup>H NMR)

The NMR spectra were recorded on a Bruker AV 400 MHz spectrometer, using tetramethylsilane as an internal standard and DMSO-*d*<sub>6</sub> as solvent.

##### DLS and Zeta potential study

Particle size and Zeta potential of (PAC-NPs) were measured on a Malvern Zetasizer Nano-ZS at a fixed scattering angle of 90° at room temperature. The polymer PAC solution (1mg/mL) was centrifuged to remove the insoluble particles

##### Scanning Electron Microscopy (SEM)

The morphologies of nanoparticles and bacteria were observed by SEM. To obtain SEM images of the nanoparticles (PAC-NPs), a drop of nanoparticle was spread on the silicon wafer and freeze-dried. In addition, the bacterial cells were incubated at 37°C to the mid log growth phase (OD<sub>600</sub>=0.4~0.6), and then treated with PAC. The treated bacteria was collected, washed with PBS and fixed with 2.5% (v/v) glutaraldehyde for 2-4 h, then washed again with PBS and distilled water, respectively. After dehydrating by 30, 50, 70, 90 and 100% ethanol and then replacing with tertiary butyl alcohol, which was dripped on the silicon wafer and freeze-dried. Samples were treated with gold before observation.

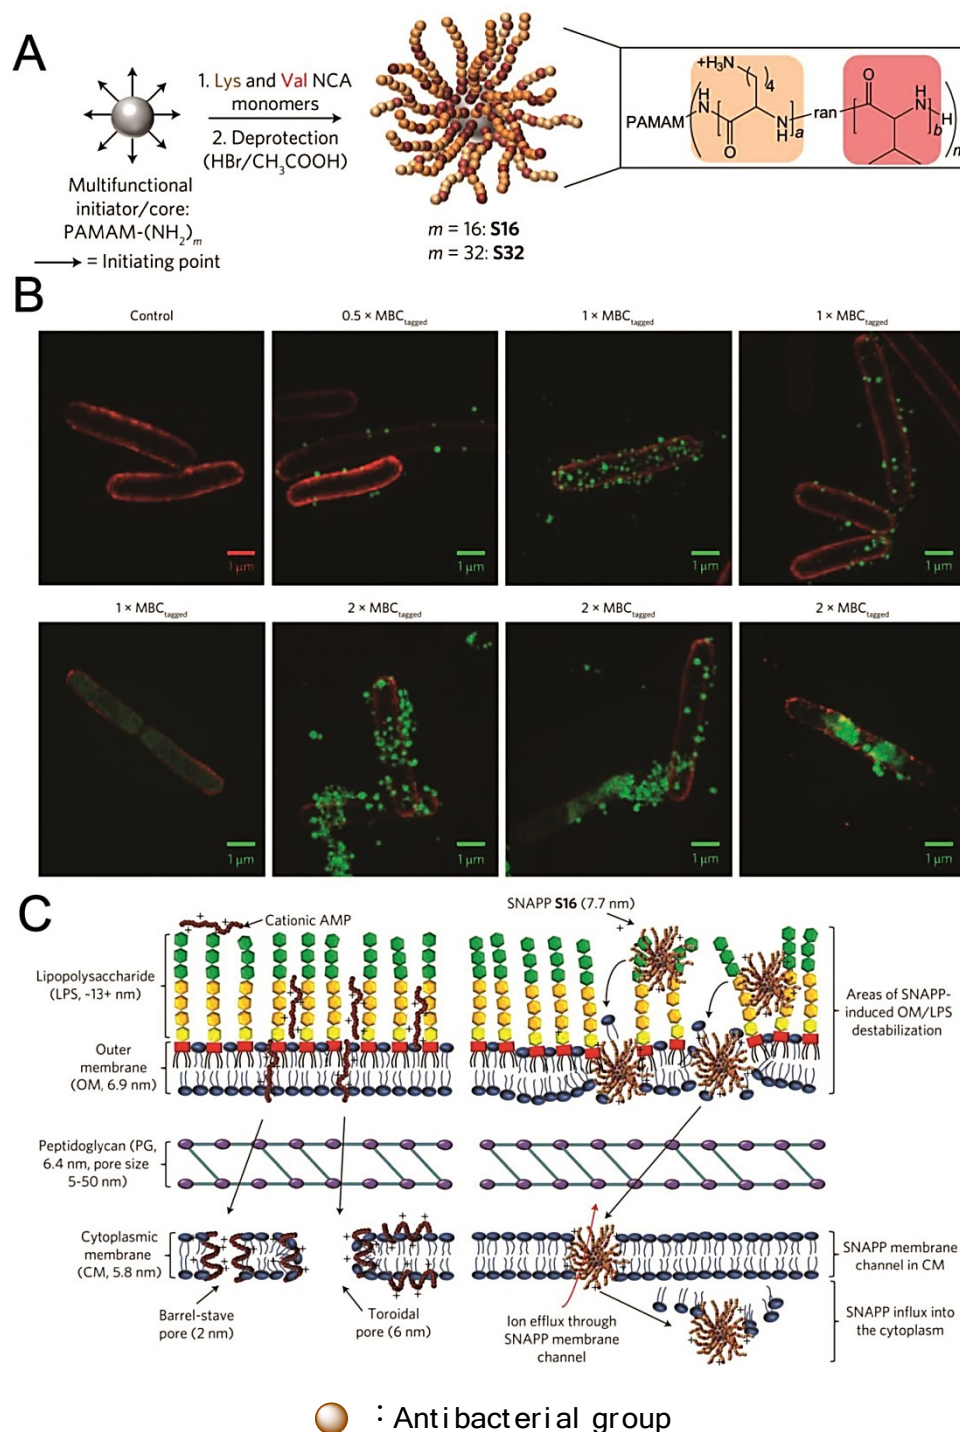

**Figure S1. A)** Synthesis of SNAPPs via ring-opening polymerization of lysine and valine N-carboxyanhydrides (NCAs). Second- and third-generation poly(amido amine) (PAMAM) dendrimers with 16 and 32 peripheral primary amines were used as the initiators to prepare 16- and 32-arm SNAPPs, respectively. The number of repeat units for lysine and valine are *a* and *b*, respectively, which served as antibacterial groups. **B)** Optical microscope experimental 3D-SIM images of *E. coli* before and after treatment with AF488-tagged SNAPP S16 in Mueller-Hinton Broth (MHB). The *E. coli* cell membrane was stained with FM4-64FX (red) and S16 with AF488 (green) in all images. Note that the MBC used refers to the MBC of the fluorescently tagged SNAPP. **C)** Antimicrobial mechanisms of typical

membrane-disrupting cationic AMPs and the possible mechanism of SNAPPs against Gram-negative bacteria.<sup>[1]</sup>

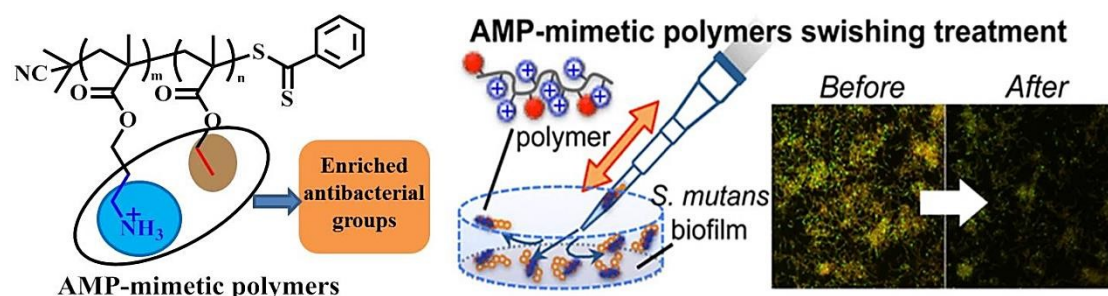

Figure S2. The structure of Cationic amphiphilic methacrylate polymers (AMP-mimetic polymers) and the antibiofilm activity of AMP-mimetic polymers.<sup>[2]</sup> AMP-mimetic polymers with enriched antibacterial groups could inhibited the growth of planktonic *S. mutans* as well as preneted the formation of *S. mutans* biofilm.

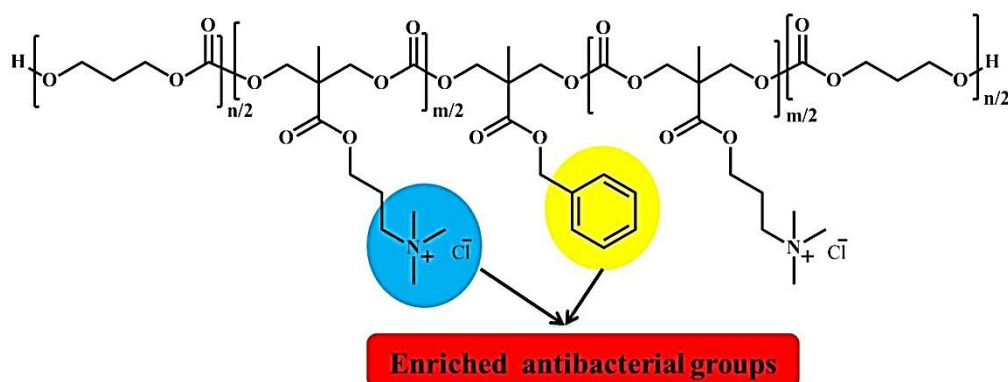

Figure S3. The structure of cationic amphiphilic polycarbonates with enriched antibacterial groups. These cationic nanoparticles formed from the polymers can efficiently kill Gram-positive bacteria, MRSA and fungi, even at low concentrations.<sup>[3]</sup>

#### References:

- [1] S. J. Lam, N. M. O. Simpson, N. Pantarat, A. Sulistio, E. H. Wong, Y. Y. Chen, J. C. Lenzo, J. A. Holden, A. Blencowe, E. C. Reynolds, G. G. Qiao, Nat. Microbiol. 2016, 1, 16162.
- [2] H. Takahashi, Enrico T. Nadres, and K. Kuroda, Biomacromolecules, 2017, 18, 257–265.
- [3] Fredrik Nederberg, Ying Zhang, Jeremy P. K. Tan, Kaijin Xu, Huaying Wang, Chuan Yang, Shujun Gao, Xin Dong Guo, Kazuki Fukushima, Lanjuan Li, James L. Hedrick and Yi-Yan Yang, Biodegradable nanostructures with selective lysis of microbial membranes, Nature chem., 2011, 3, 409–

414.

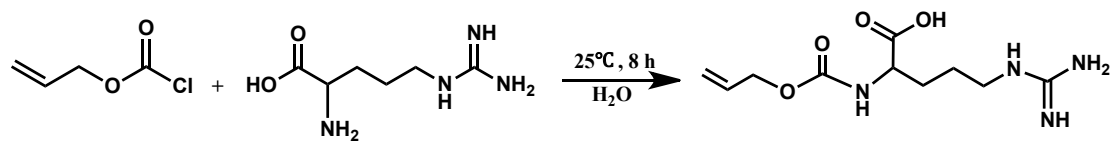

Scheme S1. Synthetic route of the AA.

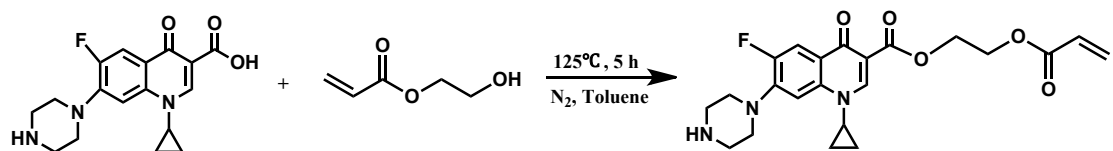

Scheme S2. Synthetic route of the ACE.

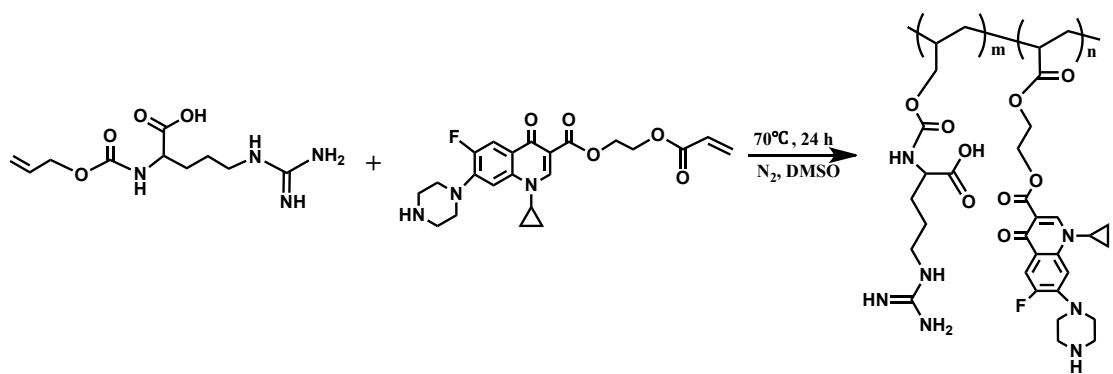

Scheme S3. Synthetic route of the polymer PAC.

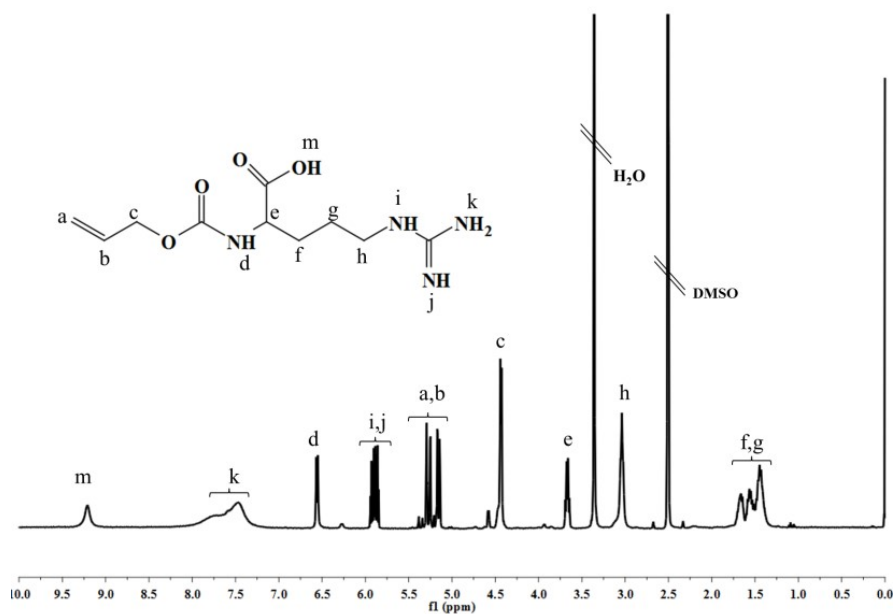

Figure S4. <sup>1</sup>H NMR spectrum of AA in DMSO-*d*<sub>6</sub>

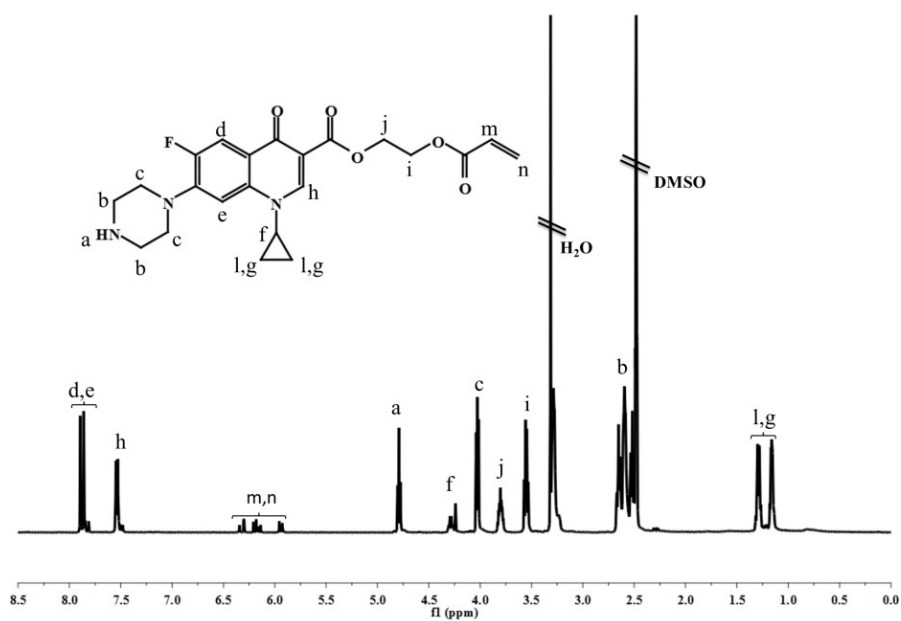

Figure S5. <sup>1</sup>H NMR spectrum of ACE in DMSO-*d*<sub>6</sub>

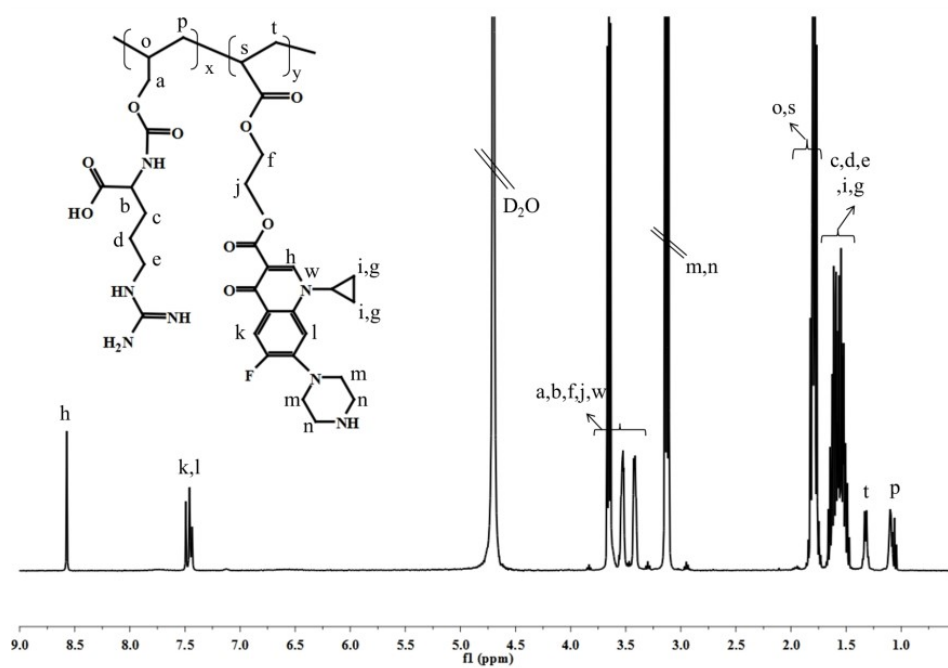

Figure S6.  $^1\text{H}$  NMR spectrum of PAC in  $\text{D}_2\text{O}$

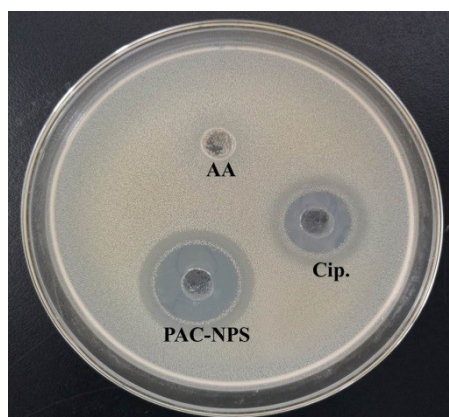

Figure S7. Inhibition zones of PAC-NPs, Ciprofloxacin and AA against *E. faecali* (ATCC29212)

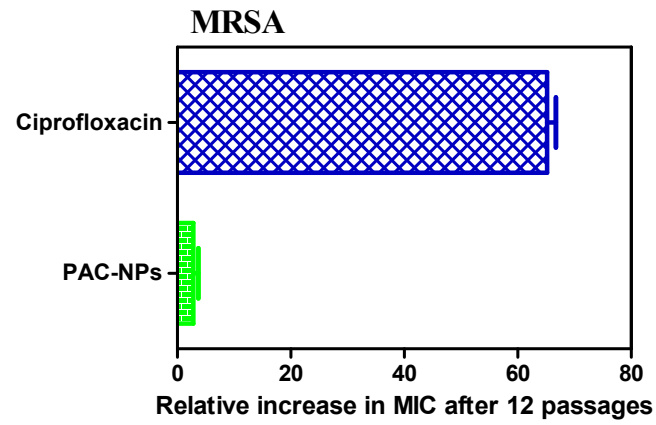

**Figure S8. Resistance acquisition in the presence of sub-MIC levels of the PAC-NPs and Ciprofloxacin.**
